# Supplementary material for: A colorimetric-aptamer-based assay for the determination of enrofloxacin through triggering the aggregation of gold nanoparticles
Source: Royal Society of Chemistry journal article supplement (doi:10.1039/d4ay01259c), 2024-01-01
Supplement: d4ay01259c1.pdf [file d4ay01259c1.pdf]

## Supporting Information

### **Colorimetric Aptamers Based on Assay for the Determination of Enrofloxacin by Triggering Aggregation of Gold Nanoparticles**

Wei-Chuang Kong<sup>1</sup>, Chen-Chen Li<sup>1</sup>, Ai-Hong Zhang<sup>1</sup>, Xin-Long Li<sup>1</sup>,  
Qian-Rui Gong<sup>1</sup>, Bing-Tan Jin<sup>1</sup>, Xiao-Juan Jia<sup>2</sup>, Xu-Ying Liu<sup>1,\*</sup>, Yan-Fei  
Kang<sup>1,\*</sup>

<sup>1</sup> College of Laboratory Medicine, Institute of Pathogen Biology and Immunology, Hebei Key Laboratory of Neuropharmacology, Hebei Key Laboratory of Quality & Safety Analysis-Testing for Agro-Products and Food and Zhang Jiakou Key Laboratory of Organic Light Functional Materials, Hebei North University, Zhangjiakou, 075000, Hebei Province, China.

<sup>2</sup> CAS Key Laboratory of Pathogenic Microbiology and Immunology, Institute of Microbiology, Chinese Academy of Sciences, Beijing 100101, China.

These authors contributed equally: Wei-Chuang Kong and Chen-Chen Li;

\*Corresponding author, E-mail addresses: [liuxuying0045@163.com](mailto:liuxuying0045@163.com) (X.-Y. Liu); [kangyanfei172@163.com](mailto:kangyanfei172@163.com) (Y.-F. Kang).

## Supporting Information

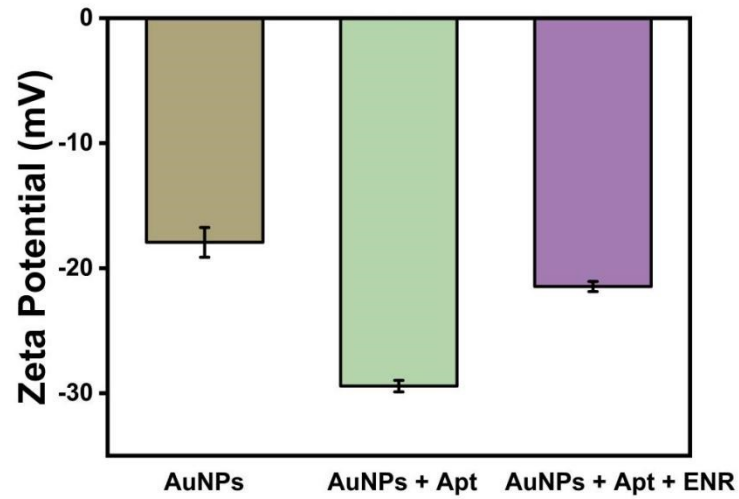

**Fig. S1** The surface  $\zeta$ -potentials of bare AuNPs, AuNPs-apptamer without and with ENR (n=3)

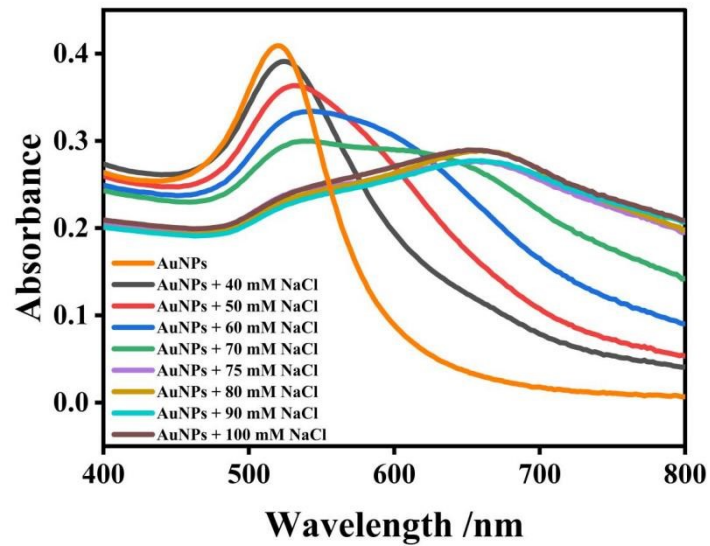

**Fig. S2** The UV-vis spectra of AuNPs in different concentration of NaCl.

## Supporting Information

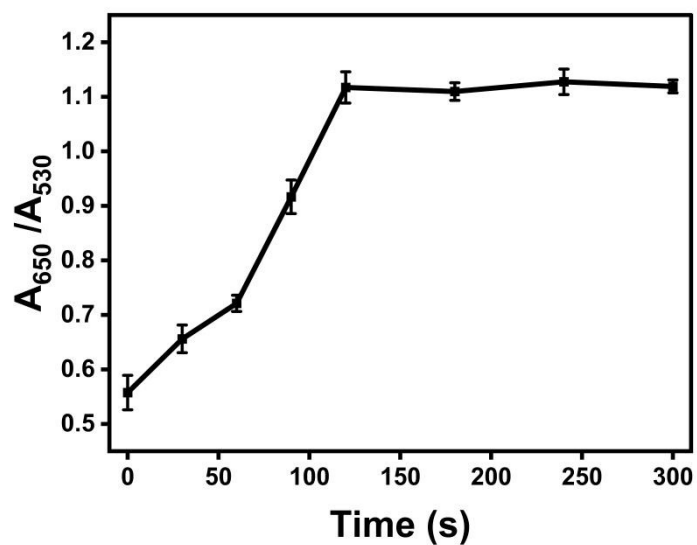

**Fig. S3** The relationship of the absorbance ratio ( $A_{650}/A_{530}$ ) of AuNP solution with the incubation time after adding NaCl to the AuNPs solution. ( $n=3$ )

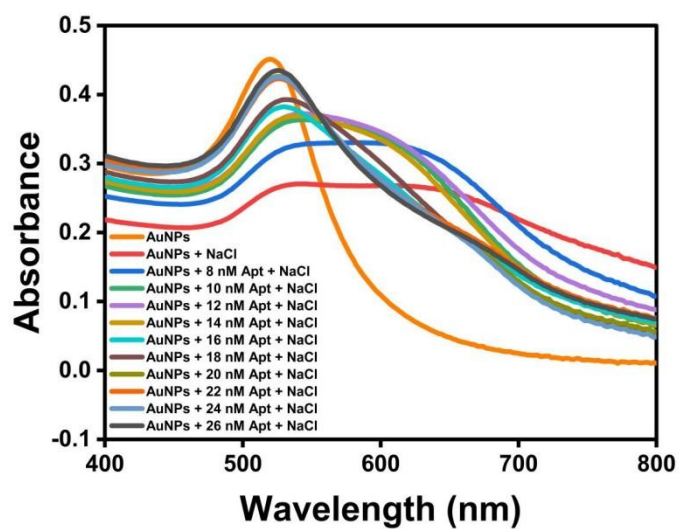

**Fig. S4** The UV-vis spectra of AuNPs in different concentration of aptamer containing NaCl.

## Supporting Information

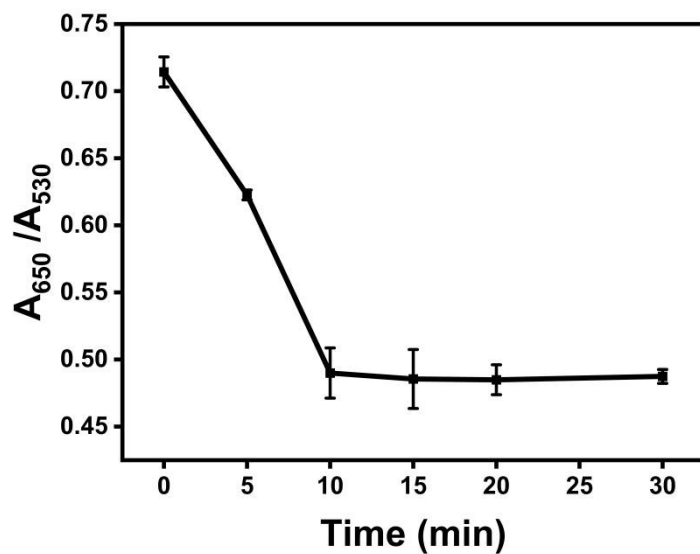

**Fig. S5** The relationship of the absorbance ratio ( $A_{650}/A_{530}$ ) of AuNPs solution with the incubation time after adding NaCl to the AuNPs solution containing aptamer. (n=3)

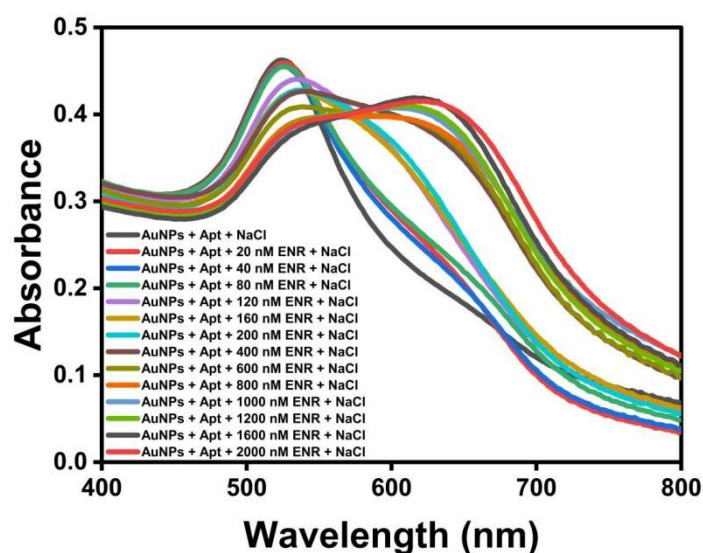

**Fig. S6** UV-vis absorption spectra of AuNPs solutions after addition of different concentrations of ENR.

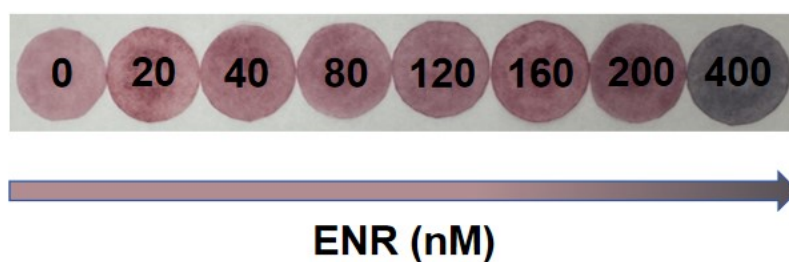

**Fig. S7** The photographs of response of colorimetric test paper in response to different concentration of ENR.
